# Supplementary material for: Syntheses and structural characterization of novel luminescent heteronuclear rhenium(i)–zinc(ii) and –cadmium(ii) chalcogenolate complexes
Source: Royal Society of Chemistry journal article supplement (doi:10.1039/b005092j), 2000-01-01
Supplement: b005092j.doc [file b005092j.doc]

# Supporting Materials

#### **Characterization**

#### **1**: 1H NMR (300 MHz, CD3CN, 298 K, relative to Me4Si):  6.40 (m, 4H, aryl H *ortho* to S), 6.70 (m, 4H, aryl H *meta* to S), 7.04 (t, 2H, *J* = 5.4 Hz, aryl H *para* to S), 7.7 (m, 4H, bpy H’s), 7.97 (m, 2H, bpy H’s), 8.25 (d, 8H, *J* = 6.5 Hz, bpy H’s), 8.55-8.85 (m, 6H, bpy H’s), 9.00 (d, 4H, *J* = 6.2 Hz, bpy H’s). Positive ESI-MS (m/z): 1436 [MPF6]+. Anal. calcd for C48H34F12N6O6P2S2ZnRe2: C, 36.43; H, 2.17; N, 5.31; found: C, 36.40; H,

#### 2.11; N, 5.41.

**2**:1H NMR (300 MHz, CD3CN, 298 K, relative to Me4Si):  2.10 (s, 6H, CH3), 6.00 (d, 4H, *J* = 7.4 Hz, aryl H *ortho* to S), 6.30 (d, 4H, *J* = 7.5 Hz, aryl H *meta* to S), 7.45 (m, 4H, bpy H’s), 7.80 (m, 2H, bpy H’s), 8.05 (d, 8H, *J* = 6.8 Hz, bpy H’s), 8.35-8.65 (m, 6H, bpy H’s), 8.75 (d, 4H, *J* = 6.3 Hz, bpy H’s). Positive ESI-MS (m/z): 1464 [MPF6]+. Anal. calcd for C50H38F12N6O6P2S2ZnRe2CH3CN: C, 37.81; H, 2.50; N, 5.94; found: C, 37.86; H, 2.23; N, 5.71.

**3**: 1H NMR (300 MHz, CD3CN, 298 K, relative to Me4Si):  6.30 (d, 4H, *J* = 6.9 Hz, aryl H *ortho* to S), 6.50 (t, 4H, *J* = 7.5 Hz, aryl H *meta* to S), 6.73 (t, 2H, *J* = 7.2 Hz, aryl H *para* to S), 7.45 (t, 4H, *J* = 7.8 Hz, bpy H’s), 7.60 (t, 4H, *J* = 8.1 Hz, bpy H’s), 8.05 (m, 8H, bpy H’s), 8.15 (t, 4H, *J* = 7.2 Hz, bpy H’s), 8.32 (m, 8H, bpy H’s), 8.80 (d, 4H, *J* = 6.4 Hz, bpy H’s). Positive ESI-MS (m/z): 1484 [MPF6bpy]+. Anal. calcd for C58H42F12N8O6P2S2CdRe2: C, 39.01; H, 2.37; N, 6.27; found: C, 38.96; H, 2.41; N, 6.08.

**4**: 1H NMR (300 MHz, CD3CN, 298 K, relative to Me4Si):  2.05 (s, 6H, CH3), 6.15 (d, 4H, *J* = 6.2 Hz, aryl H *ortho* to S), 6.30 (d, 4H, *J* = 6.3 Hz, aryl H *meta* to S), 7.45 (t, 4H, *J* = 7.1 Hz, bpy H’s), 7.60 (t, *J* = 7.2 Hz, 4H, bpy H’s), 8.00 (m, 8H, bpy H’s), 8.15 (t, 4H, *J* = 7.5 Hz, bpy H’s), 8.32 (m, 8H, bpy H’s), 8.78 (d, 4H, *J* = 6.2 Hz, bpy H’s). Positive ESI-MS (m/z): 1512 [MPF6bpy]+. Anal. calcd for C60H46F12N8O6P2S2CdRe2: C, 39.73; H, 2.56; N, 6.18; found: C, 39.80; H, 2.56; N, 6.13.

**5**: 1H NMR (300 MHz, CD3CN, 298 K, relative to Me4Si):  6.50 (m, 8H, aryl H *ortho &* *meta* to S), 6.85 (t, 2H, *J* = 7.3 Hz, aryl H *para* to S), 7.42 (t, 4H, *J* = 7.2 Hz, bpy H’s), 7.62 (t, 4H, *J* = 7.5 Hz, bpy H’s), 8.00 (m, 8H, bpy H’s), 8.20 (t, 4H, *J* = 7.8 Hz, bpy H’s), 8.40 (m, 8H, bpy H’s), 8.85 (d, 4H, *J* = 6.0 Hz, bpy H’s). Positive ESI-MS (m/z): 1578 [MPF6bpy]+. Anal. calcd for C58H42F12N8O6P2Se2CdRe2: C, 37.06; H, 2.25; N, 5.96; found: C, 36.83; H, 2.13; N, 5.94.

**6**: 1H NMR (300 MHz, CD3CN, 298 K, relative to Me4Si):  1.40 (s, 36H, *t*Bu), 2.05 (s, 6H, CH3), 6.00 (d, 4H, *J* = 5.6 Hz, aryl H *ortho* to S), 6.20 (d, 4H, *J* = 5.7 Hz, aryl H *meta* to S), 7.46 (d, 4H, *J* = 6.2 Hz, bpy H’s), 7.60 (t, 4H, *J* = 7.3 Hz, bpy H’s), 7.96 (s, 4H, bpy H’s), 8.18 (t, 4H, *J* = 8.2 Hz, bpy H’s), 8.35 (m, 8H, bpy H’s), 8.70 (d, 4H, *J* = 6.6 Hz, bpy H’s). Positive ESI-MS (m/z): 1736 [MPF6bpy]+. Anal. calcd for C76H78F12N8O6P2S2CdRe2: C, 44.78; H, 3.86; N, 5.50; found: C, 45.20; H, 4.08; N, 5.37.

Crystal data for **2**: [(C50H38N6O6S2ZnRe2)2+ 2PF6]; *M*r = 1610.73, triclinic, space group *P* (No. 2), *a* = 12.107(5) Å, *b* = 12.348(5) Å, *c* = 20.271(4) Å, ** = 74.30(2)o, ** = 85.20(2)o, ** = 79.10(2)o, *U* = 2863(3) Å3, *Z* = 2, *D*c = 1.868 g cm3, **(Mo-K**) = 48.55 cm1, *F*(000) = 1556, T = 301 K. A yellow crystal of dimensions 0.40  0.15  0.05 mm mounted on a glass fibre was used for data collection at 28 oCon a Rigaku AFC7R diffractometer with graphite monochromatized Mo-K** radiation ( = 0.71073 Å) using **-2** scans with **-scan angle (0.68 + 0.35 tan**)o at a scan speed of 8.0 deg min1 (up to 6 scans for reflection with *I*  15(*I*)). Intensity data (in the range of 2**max = 50 o; *h*: 14 to 14; *k*: 0 to 13; *l*: 23 to 24 and 3 standard reflections measured after every 300 reflections showed decay of 1.26 %) were corrected for decay and for Lorentz and polarization effects, and empirical absorption corrections based on the -scan of five strong reflections (minimum and maximum transmission factors 0.573 and 1.000). 10397 reflections were measured, of which 9885 were unique and *R*int = 0.054. 6087 reflections with *I*  3**(*I*) were considered observed and used in the structural analysis. One crystallographic asymmetric unit consists of one formula unit. In the least-squares refinement, all 81 non-H atoms were refined anisotropically and 38 H atoms at calculated positions with thermal parameters equal to 1.3 times that of the attached C atoms were not refined. Convergence for 730 variable parameters by least-squares refinement on *F* with *w* = 4*F*o2 / **2(*F*o2), where **2(*F*o2) = [**2(*I*) + (0.030*F*o2)2] for 6087 reflections with *I*  3** (*I*) was reached at *R* = 0.035 and *wR* = 0.043 with a goodness-of-fit of 1.34. (**/**)max = 0.05. The final difference Fourier map was featureless, with maximum positive and negative peaks of 1.17 and 1.42 eÅ3 respectively. The space groups for [{(bpy)Re(CO)3(**-SC6H4-CH3-*p*)}2Zn(bpy)](PF6)2 (**2**) was determined based on systematic absences and on a statistical analysis of intensity distribution and the successful refinement of the structure solved by Patterson methods and expanded by Fourier method (*PATTY*)a and refinement by full-matrix least-squares using the software package *TeXsan*b on a Silicon Graphics Indy computer.

a*PATTY*: Beurskens, P. T.; Admiral, G.; Beursken, G.; Bosman, W. P.; Garcia-Granda, S.; Gould, R. O.; Smits, J. M. M.; Smykalla, C. (**1992**). The *DIRDIF* program system, Technical Report of the Crystallography Laboratory, University of Nijmegen, The Netherlands.

b*TeXsan*: Crystal Structure Analysis Package, Molecular Structure Corp., **1985** and **1992**.

Crystal data for **4**: [C60H46N8O6S2CdRe2]2+2PF6; *M*r = 1813.95, monoclinic, space group P2/*n* (No. 13), *a* = 13.691(2) Å, *b* = 15.663(3) Å, *c* = 15.551(3) Å, ** = 106.34(2)o, *U* = 3200(1) Å3, *Z* = 2, *D*c = 1.882 g cm3, **(Mo-K**) = 43.12 cm1, *F*(000) = 1756, T = 301 K. An orange crystal of dimensions 0.35  0.15  0.10 mm inside a glass capillary was used for data collection at 28 oCon a MAR diffractometer with a 300 mm image plate detector using graphite monochromatized Mo-K** radiation ( = 0.71073 Å). Data collection was made with 3o oscillation (60 images) at 120 mm distance and 420 s exposure. The images were interpreted and intensities integrated using the program *DENZO*.a 6102 unique reflections were obtained from a total of 27436 measured reflections (*R*int = 0.080). 4914 reflections with *I*  3**(*I*) were considered observed and used in the structural analysis. These reflections were in the range of *h*: 0 to 16; *k*: 0 to 18; *l*: 18 to 17 with 2**max = 50.9o. A crystallographic asymmetric unit consists of half of one formula unit. The two halves of cation are related by symmetry through Cd(1) at special position. Both P(1) and P(2) are at special positions and the anion generated around P(2) are disordered with F(4), F(4’), F(5), F(5’), F(6) and F(7) having occupation numbers of 0.5, 0.25, 0.5, 0.25, 1.0 and 0.5 respectively. In the least-squares refinement, all 51 non-H atoms were refined anisotropically and 23 H atoms at calculated positions with thermal parameters equal to 1.3 times that of the attached C atoms were not refined. Convergence for 440 variable parameters by least-squares refinement on *F* with *w* = 4*F*o2/ **2(*F*o2), where **2(*F*o2) = [**2(*I*) + (0.036*F*o2)2] for 4914 reflections with *I*  3** (I) was reached at *R* = 0.038 and *wR* = 0.056 with a goodness-of-fit of 1.27. (**/**)max = 0.04 except for the disordered F atoms. The final difference Fourier map was featureless, with maximum positive and negative peaks of 1.00 and 1.38 eÅ3 respectively. The space groups for [{(bpy)Re(CO)3(**-SC6H4-CH3-*p*)}2Cd(bpy)2](PF6)2 (**4**) was determined based on systematic absences and on a statistical analysis of intensity distribution and the successful refinement of the structure solved by Patterson methods and expanded by Fourier method (*PATTY*)b and refinement by full-matrix least-squares using the software package *TeXsan*c on a Silicon Graphics Indy computer.

aIn “The HKL Manual- A description of programs DENZO, XDISPLAYF, and SCALEPACK” written by Gewirth, D. with the cooperation of the program authors Otwinowski, Z. and Minor, W. (**1995**), Yale University, New Haven, U.S.A.

b*PATTY*: Beurskens, P. T.; Admiral, G.; Beursken, G.; Bosman, W. P.; Garcia-Granda, S.; Gould, R. O.; Smits, J. M. M.; Smykalla, C. (**1992**). The *DIRDIF* program system, Technical Report of the Crystallography Laboratory, University of Nijmegen, The Netherlands.

c*TeXsan*: Crystal Structure Analysis Package, Molecular Structure Corp., **1985** and **1992**.
